# Supplementary material
Source: PubMed Central journal article supplement (PMC4536826)
Supplement: NIHMS711130-supplement-supplemental.pdf [file NIHMS711130-supplement-supplemental.pdf]

Supplemental figure legends:

**Figure S1: ImageStream analysis gating steps and ImageStream quantification.**

Single cells were imaged using INSPIRE software and image analysis was performed using IDEAS image analysis software version 4.0 (AMNIS Corporation, Seattle USA). A: CD45 and F4/80 negative events of cellular size (using the “area” feature for the bright field channel) were selected. B: From CD45 negative events, round events were selected using the “aspect ratio” and “aspect ratio intensity” features. C: In the next step, cells in focus and with optimal image contrast were selected. D: SPC positive cells were selected and further analyzed for the presence of bright spots (E) in the SPC channel (lamellar bodies) using the “spot count” feature and peak mask. F: From all cells with at least two bright spots in the SPC channel, only cells that did not exhibit co-localization of the SPC signal with the cytokeratin signal (to exclude autofluorescent cells) were selected for further analysis. G: Total number of mice with SPC-positive cells detected (numerator) and total number of mice analyzed (denominator). Total number of SPC-positive cells detected (numerator) and total number of CD45-negative lung cells analyzed (denominator). Percentages of T2 cells derived from donor BM detected by ImageStream calculated based on the number of T2 cells among CD45-negative, round cells in corresponding WT samples, which was set to 100%.

**Figure S2: Sorting of type 2 pneumocytes based on expression of Epcam and CD49f.**

A: In SPC-H2B-GFP control mice, about 1% of CD45-CD31-lineage-cells express GFP. GFP+ cells are uniformly positive for both Epcam and CD49f. B: Immunofluorescence for SPC reveals that 90% of sorted cells positive for both Epcam and CD49f express SPC protein.

**Figure S3: Expression of SPC, cytokeratin, CCSP in lung cells and VSELs.**

A: Immunofluorescent staining of freshly isolated lung cells or VSELs for SPC (red) and Cytokeratin (green). B-D: Expression of SPC, CCSP, and OCT4 mRNA in lung cells, WBM, HSC and VSELs by RT-qPCR, normalized to expression of the control gene  $\beta$ 2-microglobulin. Fold increase of expression is shown compared to WBM, which was set to 1. (Data shown are representative of three independent experiments that gave analogous results.)

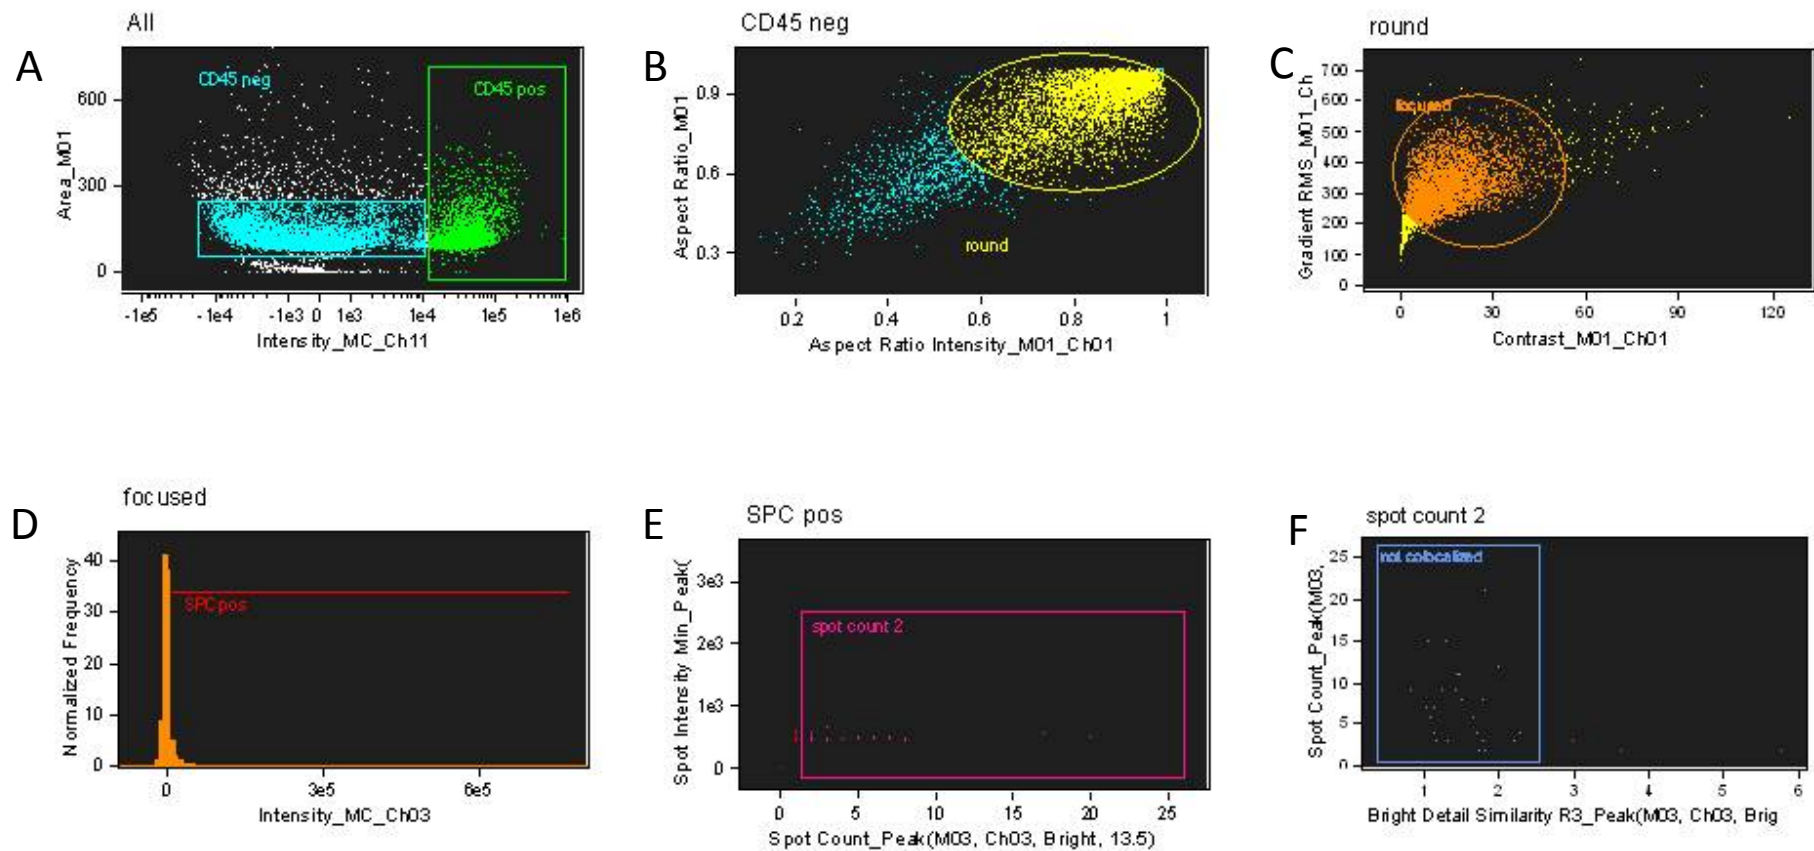

### Image Stream Quantification

**G**

|                                | Mice with SPC positive cells/<br># of mice analyzed | SPC+ cells/<br>CD45- | % SPC+/<br>CD45- |
|--------------------------------|-----------------------------------------------------|----------------------|------------------|
| VSEL                           | 27/28                                               | 259/166738           | 0.15             |
| Non-VSEL                       | 12/21                                               | 18/87478             | 0.02             |
| HSPC (Lin-<br>Sca-1+<br>CD45+) | 0/7                                                 | 0/15,973             | 0                |
| Wild type                      | 5/5                                                 | 1920/60.000          | 3.2              |

Denominator: intact CD45- cells

Figure S1

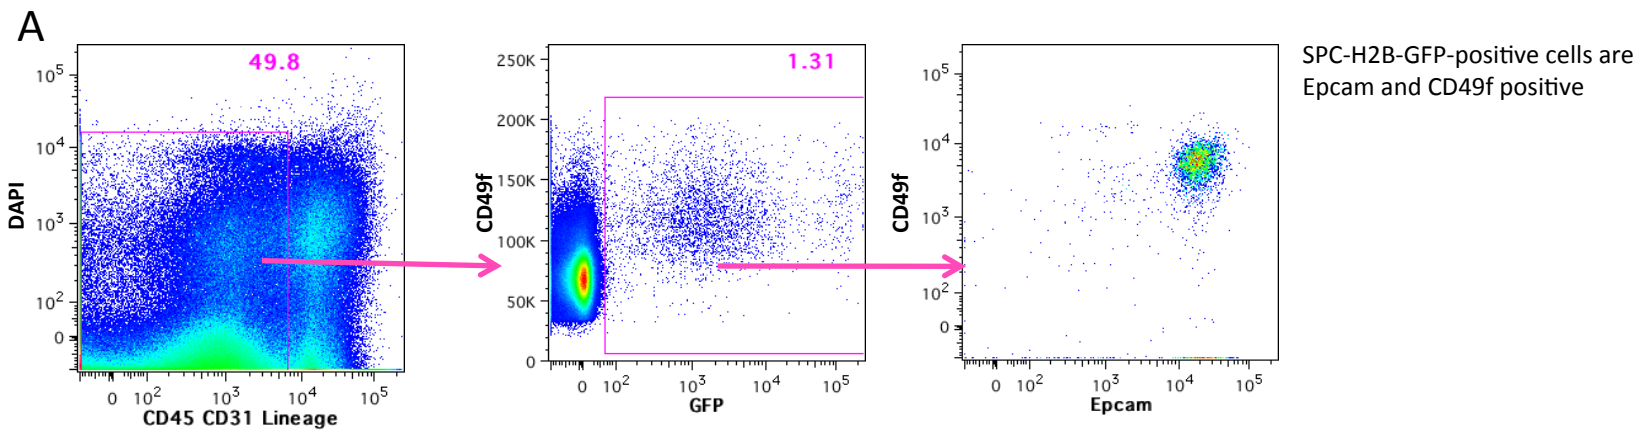

**B** Epcam CD49f + cells: 90% SPC pos

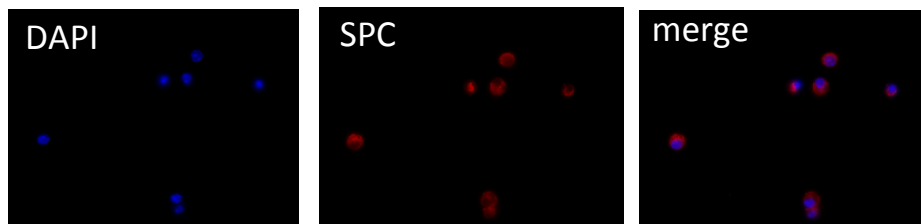

Figure S2

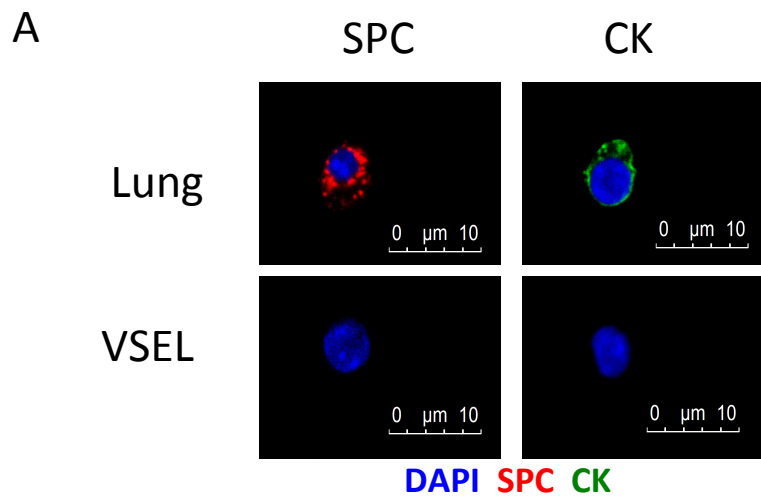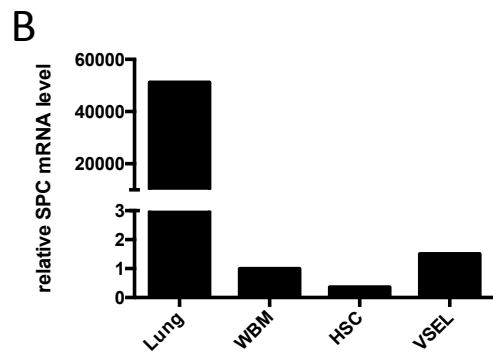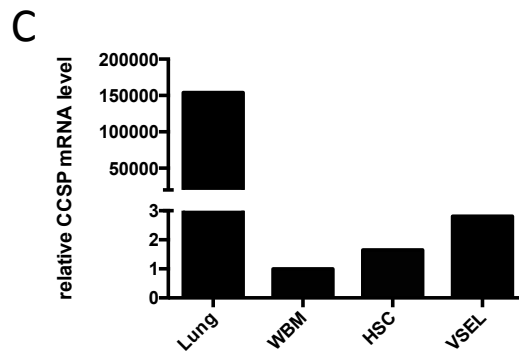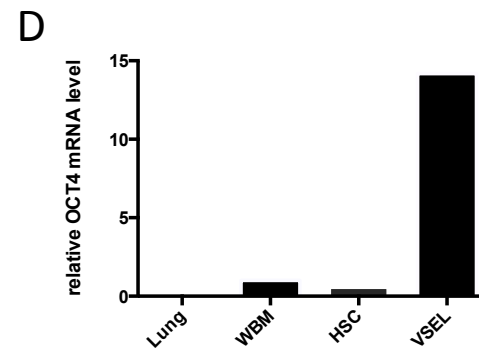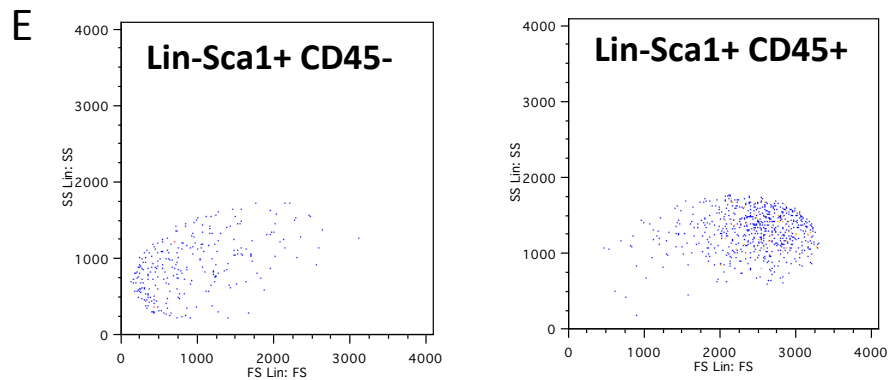

Figure S3
